# Supplementary figures and images for: The Shigella flexneri effector IpaH1.4 facilitates RNF213 degradation and protects cytosolic bacteria against interferon-induced ubiquitylation
Source: eLife journal article supplement (doi:10.7554/elife.102714), 2024-11-20

A

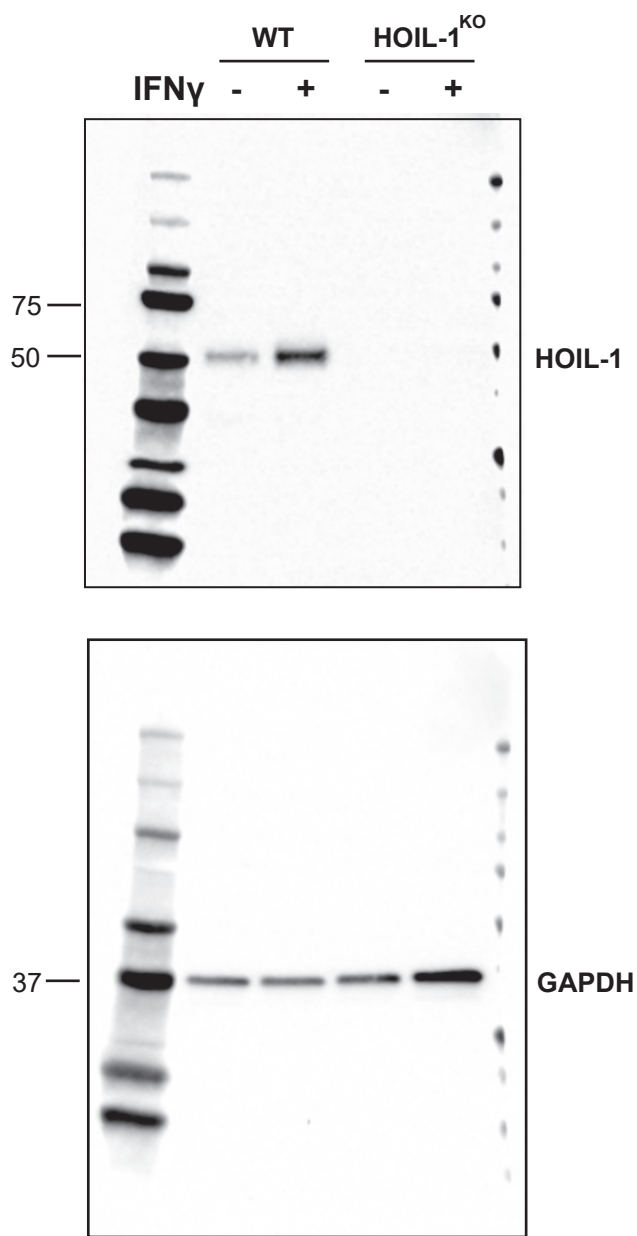

Figure 3A-HOIL Blot- Source Data 1

**A**

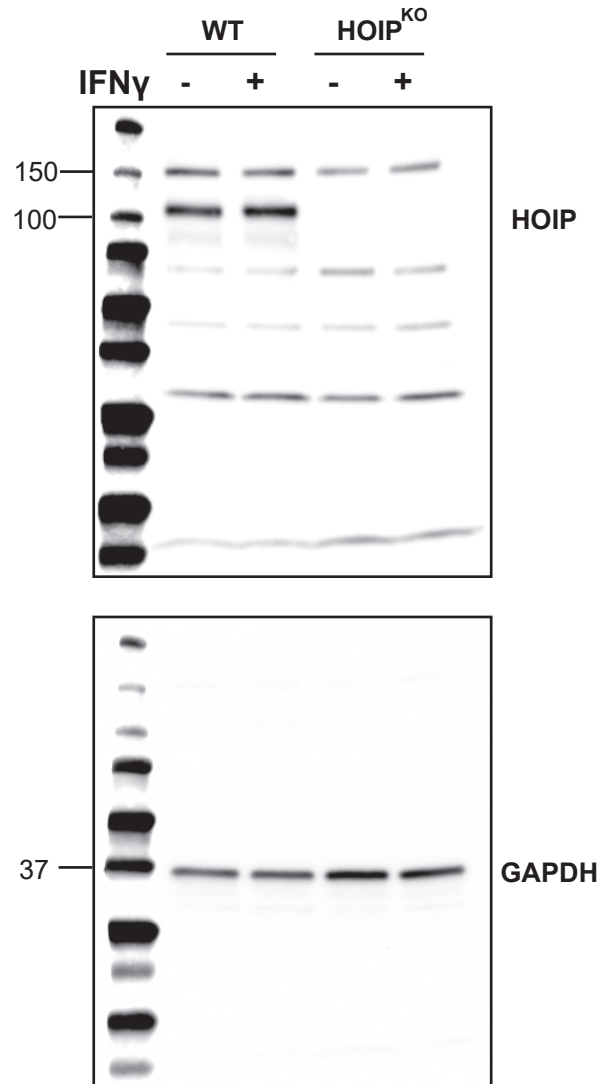

**Figure 3A-HOIP Blot- Source Data 1**

A

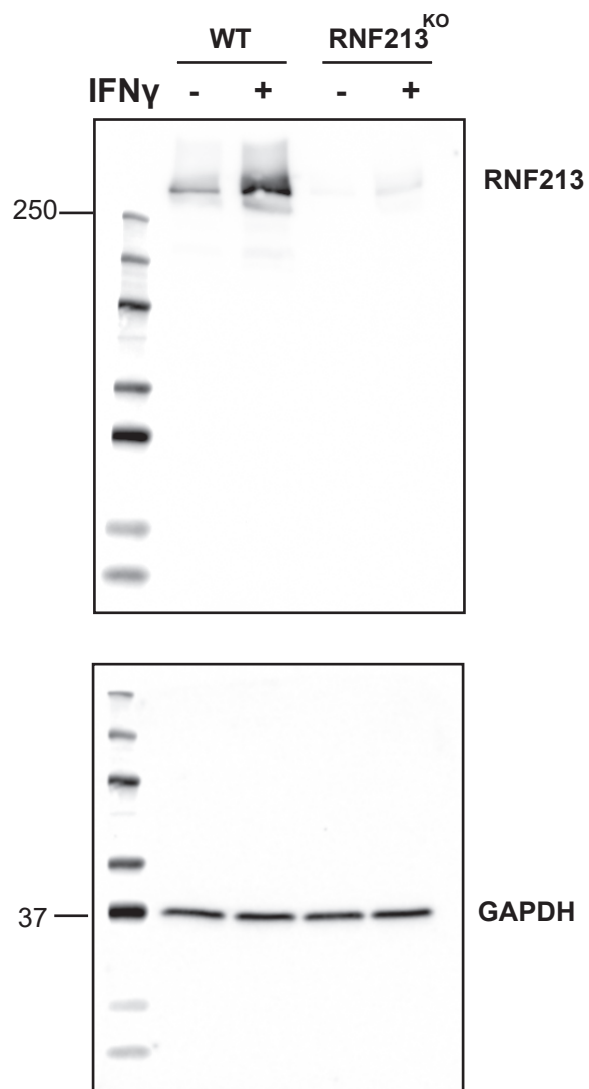

Figure 3A-RNF213 Blot- Source Data 1

Supplement: fig3-data1 [file Figure_3A_Source Data 1.pdf › Figure 3-Source-data-1/Figure_3A_Source Data 1.pdf]

**A**

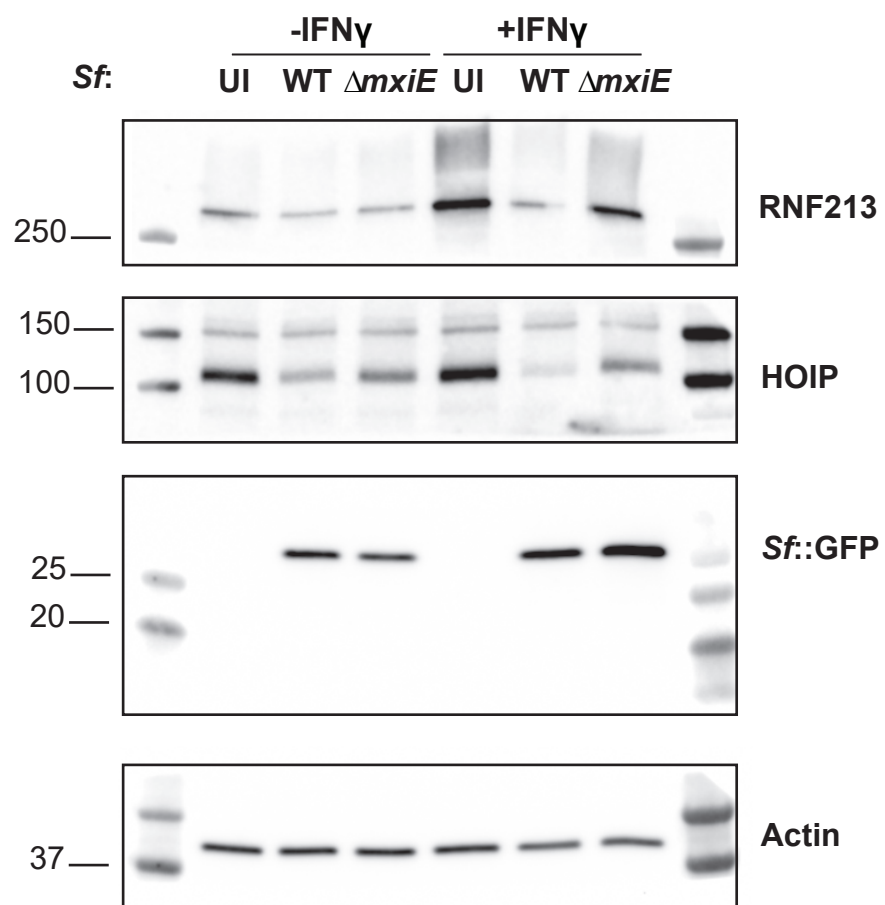

**Figure 4A- Source Data 1**

**B**

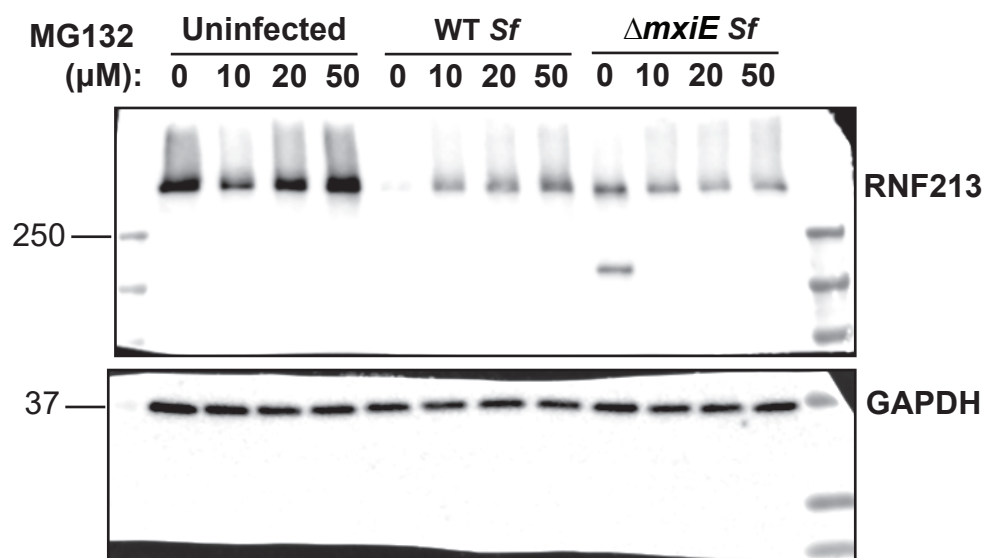

**Figure 4B- Source Data 1**

**C**

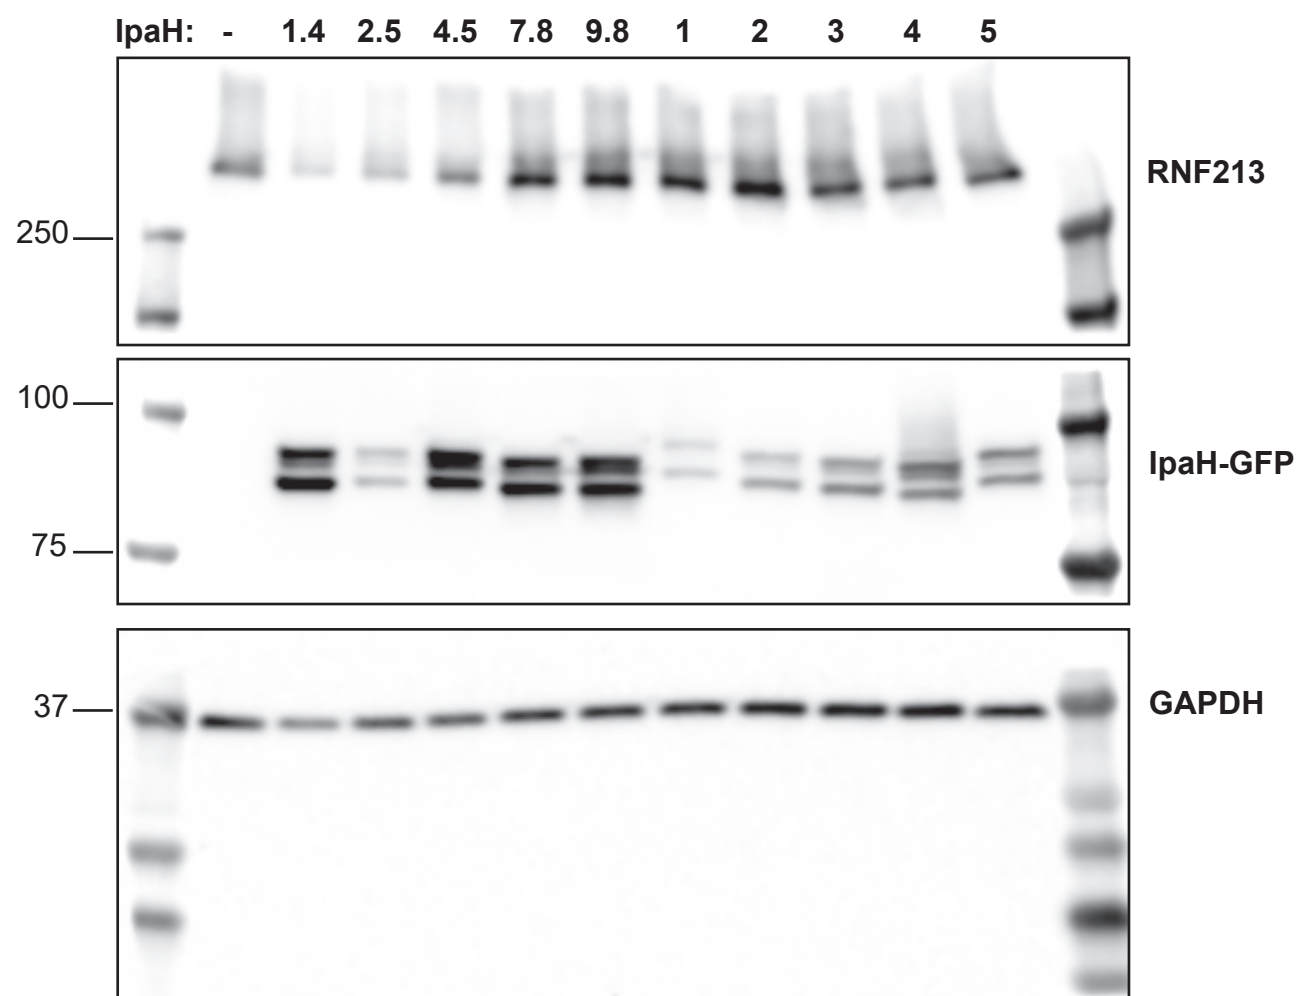

**Figure 4C- Source Data 1**

D

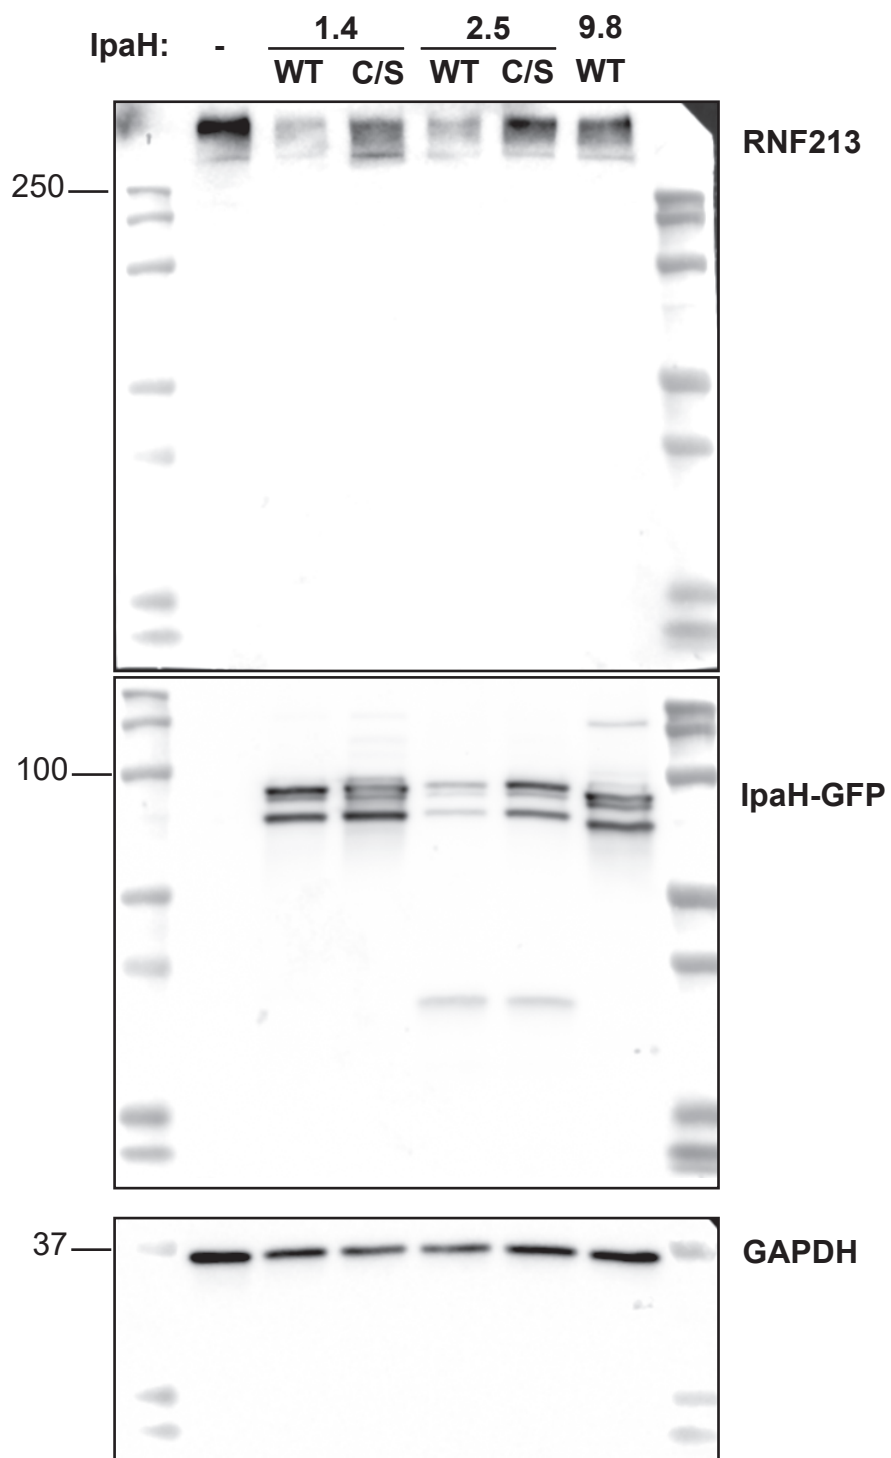

Figure 4D- Source Data 1

Supplement: fig4-data1 [file Figure_4_Source Data 1.pdf › Figure 4-Source-data-1/Figure_4_Source Data 1.pdf]

A

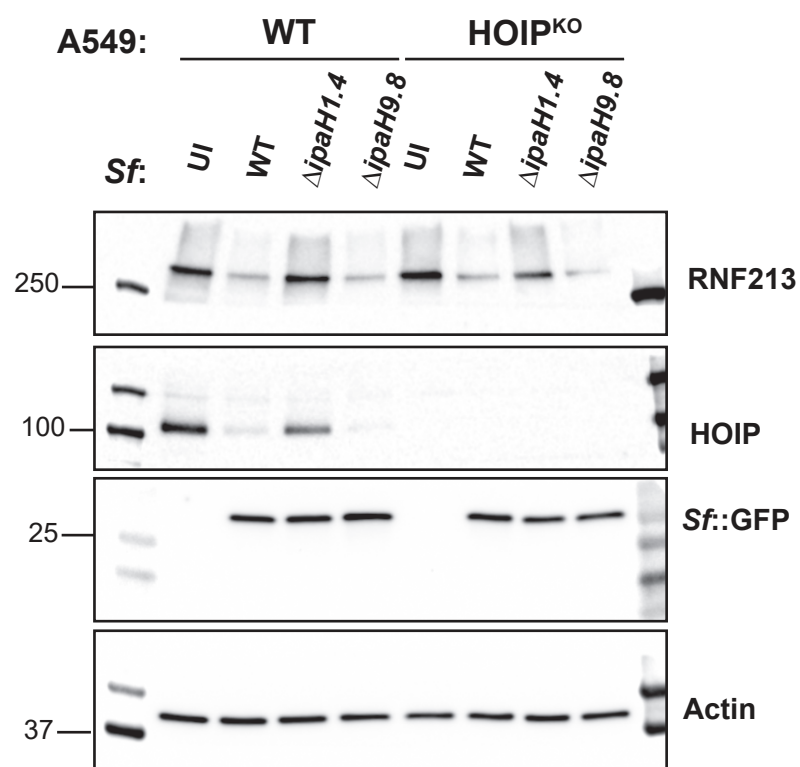

**Figure 5A- Source Data 1**

Supplement: fig5-data1 [file Figure_5A_Source Data 1.pdf › Figure 5-Source-data-1/Figure_5A_Source Data 1.pdf]

**B**

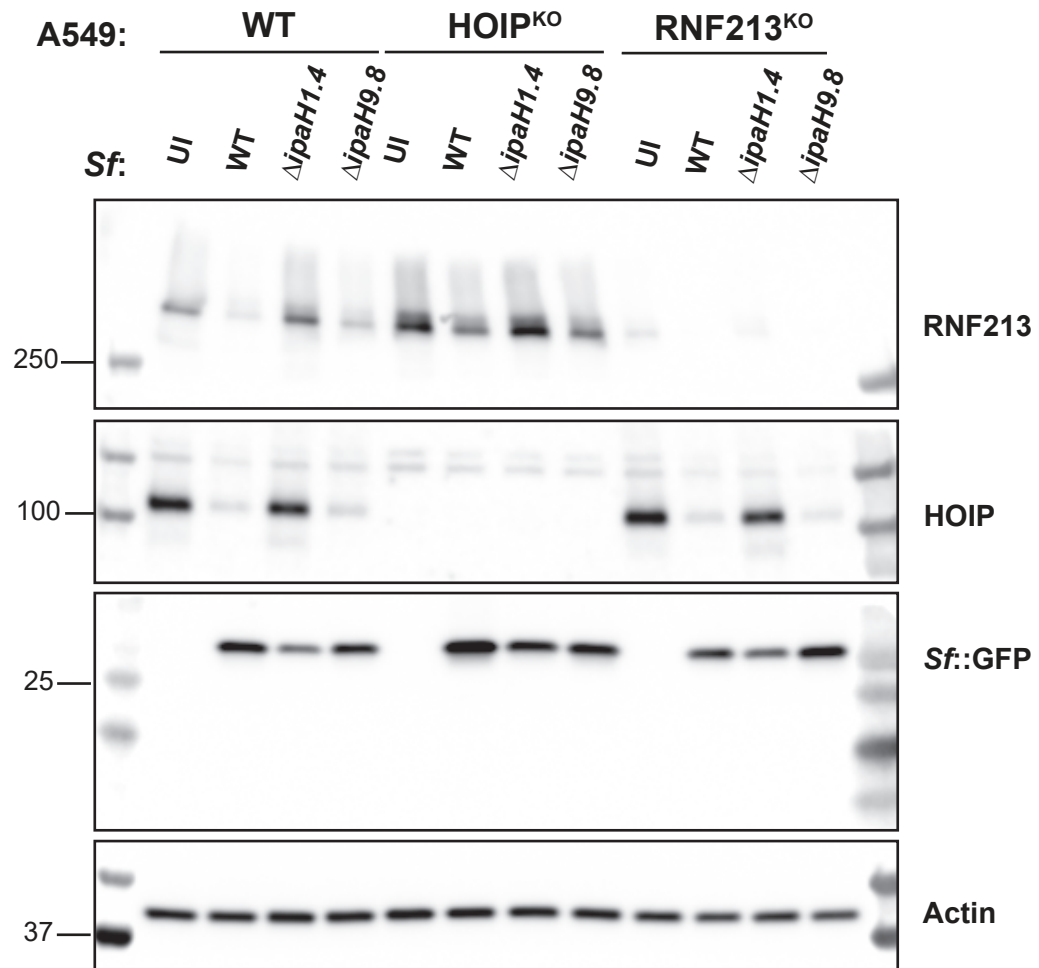

**Figure 5(Figure Supplement 1) - Source Data 1**

Supplement: fig5-figsupp1-data1 [file Figure 5 - Figure Supplement 1_Source data 1.pdf › Figure 5_Figure Supplement 1-Source-data-1/Figure 5 - Figure Supplement 1_Source data 1.pdf]

**A**

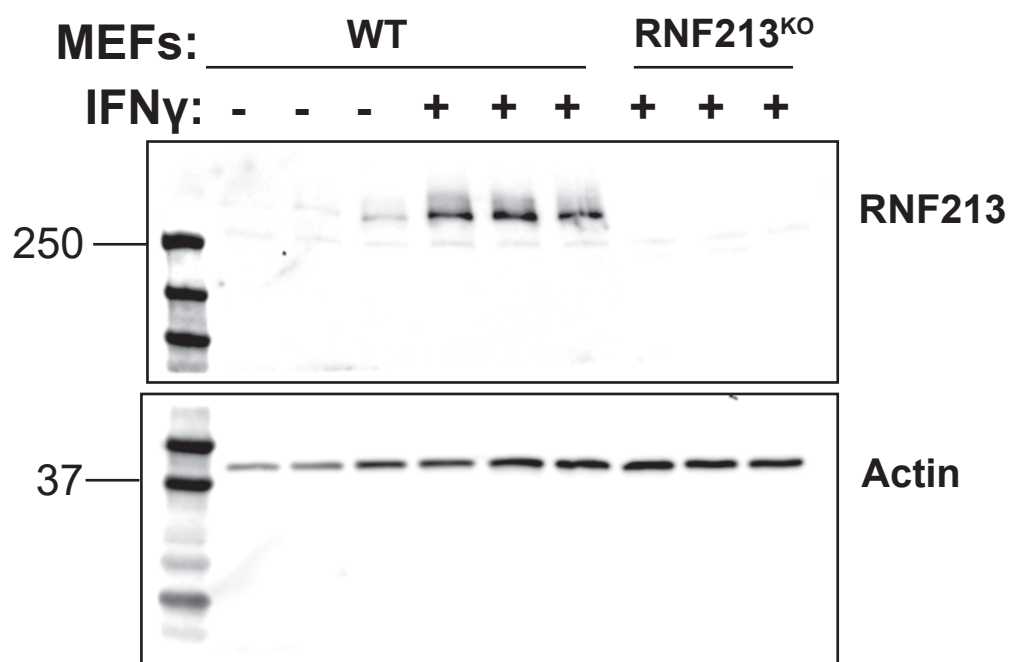

**Figure 5(Figure Supplement 2) - Source Data 1**

Supplement: fig5-figsupp2-data1 [file Figure 5 - Figure Supplement 2_Source data 1.pdf › Figure 5_Figure Supplement 2-Source-data-1/Figure 5 - Figure Supplement 2_Source data 1.pdf]
